# Supplementary material for: Subtle structural engineering of a coordination polymer host for the fluorescence modulation of host–guest donor–acceptor systems
Source: Royal Society of Chemistry journal article supplement (doi:10.1039/d3qi01417g), 2023-01-01
Supplement: d3qi01417g1.pdf [file d3qi01417g1.pdf]

## Electronic Supplementary Information

### **Subtle structural engineering of coordination polymer host for the fluorescence modulation of host-guest donor-acceptor systems**

Hong-Xiang Nie,<sup>a</sup> Bo Zhang,<sup>a</sup> Yi-Ming Liu,<sup>a</sup> Mei-Hui Yu<sup>a</sup> and Ze Chang<sup>\*a</sup>

<sup>a</sup> School of Materials Science and Engineering, Tianjin Key Laboratory of Metal and Molecule-Based Material Chemistry, Nankai University, Tianjin 300350, China.

**Contacts:** Ze Chang: [changze@nankai.edu.cn](mailto:changze@nankai.edu.cn),

## Contents

**Fig. S1** The binding energy spectrum of F for **1**.

**Fig. S2** Coordination environment in complex **1**.

**Fig. S3** The experimental and simulated PXRD patterns of complex **1**.

**Fig. S4** The experimental and simulated PXRD patterns of complex **2**.

**Fig. S5** The PXRD patterns of **1** and **PAHs@1**.

**Figure S6** The PXRD patterns of **2** and **PAHs@2**.

**Fig. S7** Infrared spectroscopy of **1**, **2**, **PAHs@1** and **PAHs@2**.

**Fig. S8.** The thermogravimetric curve of **1**, and **PAHs@1** at air atmosphere.

**Fig. S9** The thermogravimetric curve of **2**, and **PAHs@2** at air atmosphere.

**Figure S10-S14.** The <sup>1</sup>H NMR spectra of digested **1** and **PAHs@1** crystal samples and the corresponding ligands and guest.

**Fig. S15-S19** The <sup>1</sup>H NMR spectra of digested **2** and **PAHs@2** crystal samples and the corresponding ligands and guest.

**Fig. S20.** UV-vis spectra of the complexes **1** and **PAHs@1**.

**Fig. S21** UV-vis spectra of the complexes **2** and **PAHs@2** .

**Figure S22** Linear correlation between the emission maxima of **PAHs@1**, **PAHs@2** and the ionization potential (IP) of corresponding guests.

**Fig. S23** Emission decay traces and fits results of the fluorescent lifetime ( $\tau$ ) for complexes **PAHs@1** and **PAHs@2**.

**Table S1.** Crystal data and structure refinement parameters for the partial complexes.

**Table S2.** Guest loading in **PAHs@1** and **PAHs@2**.

**Table S3.** Summary of Crystallographic parameter data for complexes.

## References

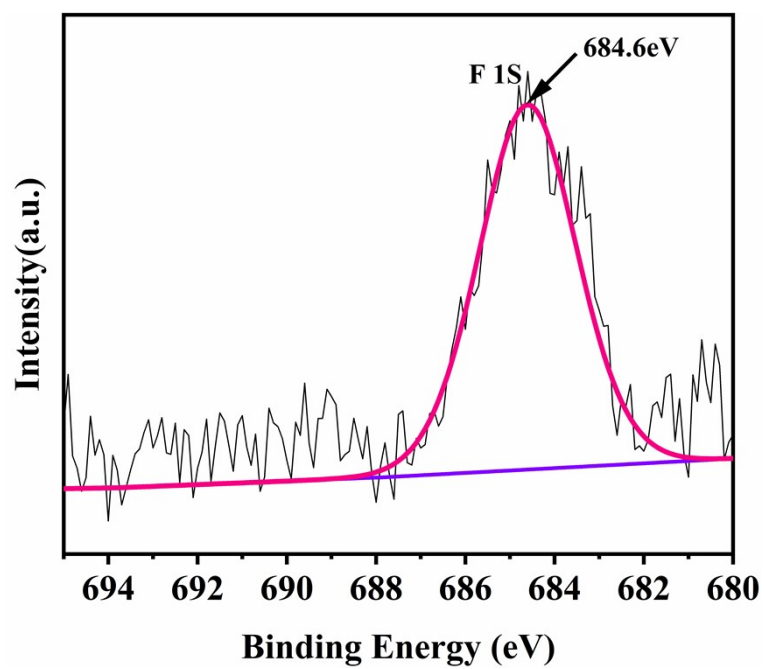

Fig. S1 The binding energy spectrum of F for 1.

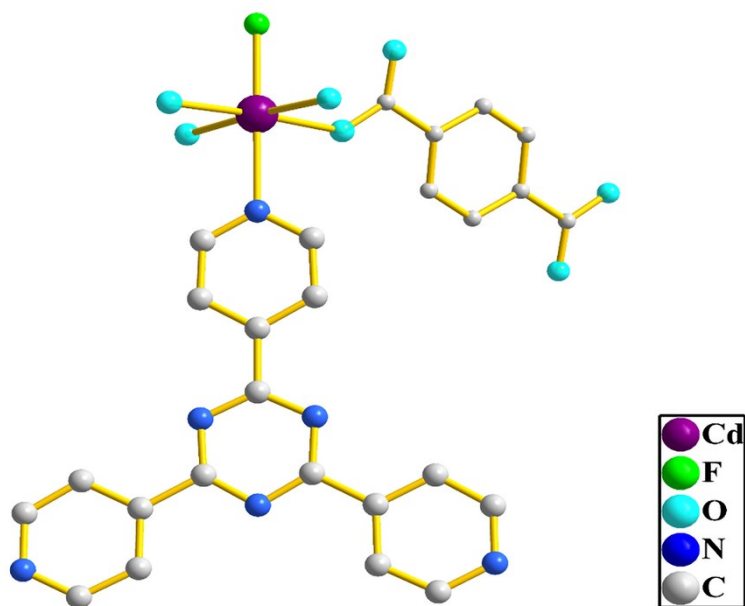

Fig. S2 Coordination environment of Cd (II) ions and ligand in complex 1.

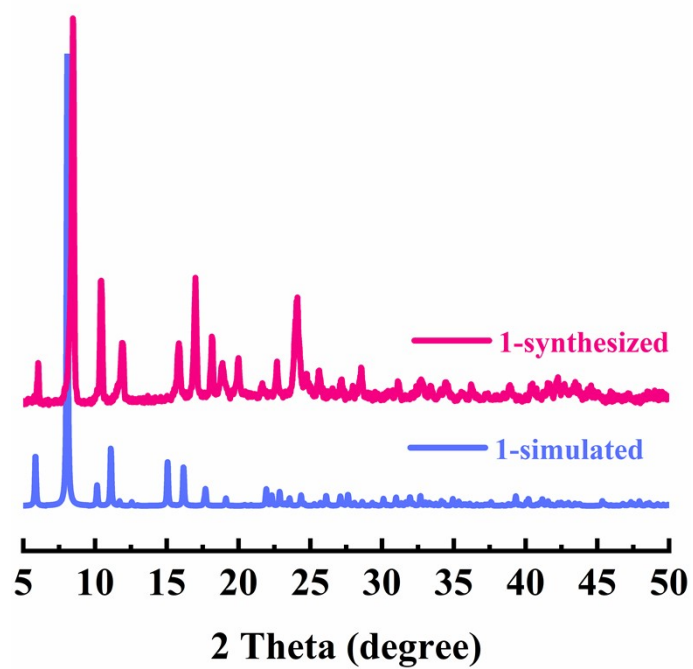

**Fig. S3** The experimental and simulated PXRD patterns of sample 1.

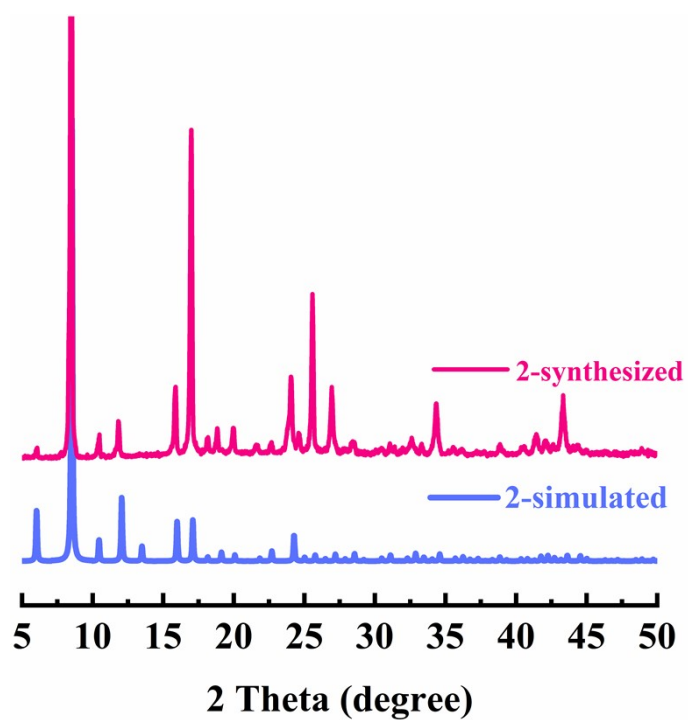

**Fig. S4** The experimental and simulated PXRD patterns of sample 2.

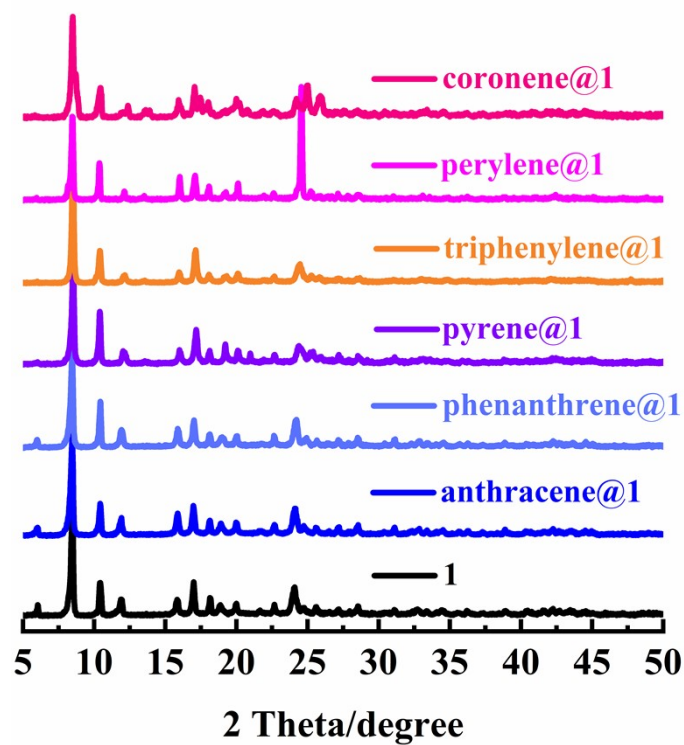

Fig. S5 The PXRD patterns of 1 and PAHs@1.

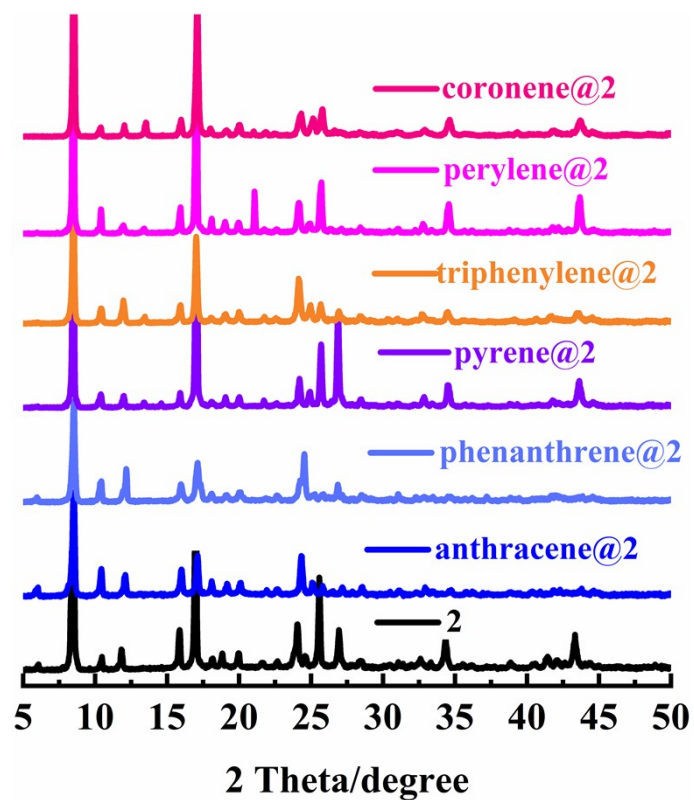

Fig. S6 The PXRD patterns of 2 and PAHs@2.

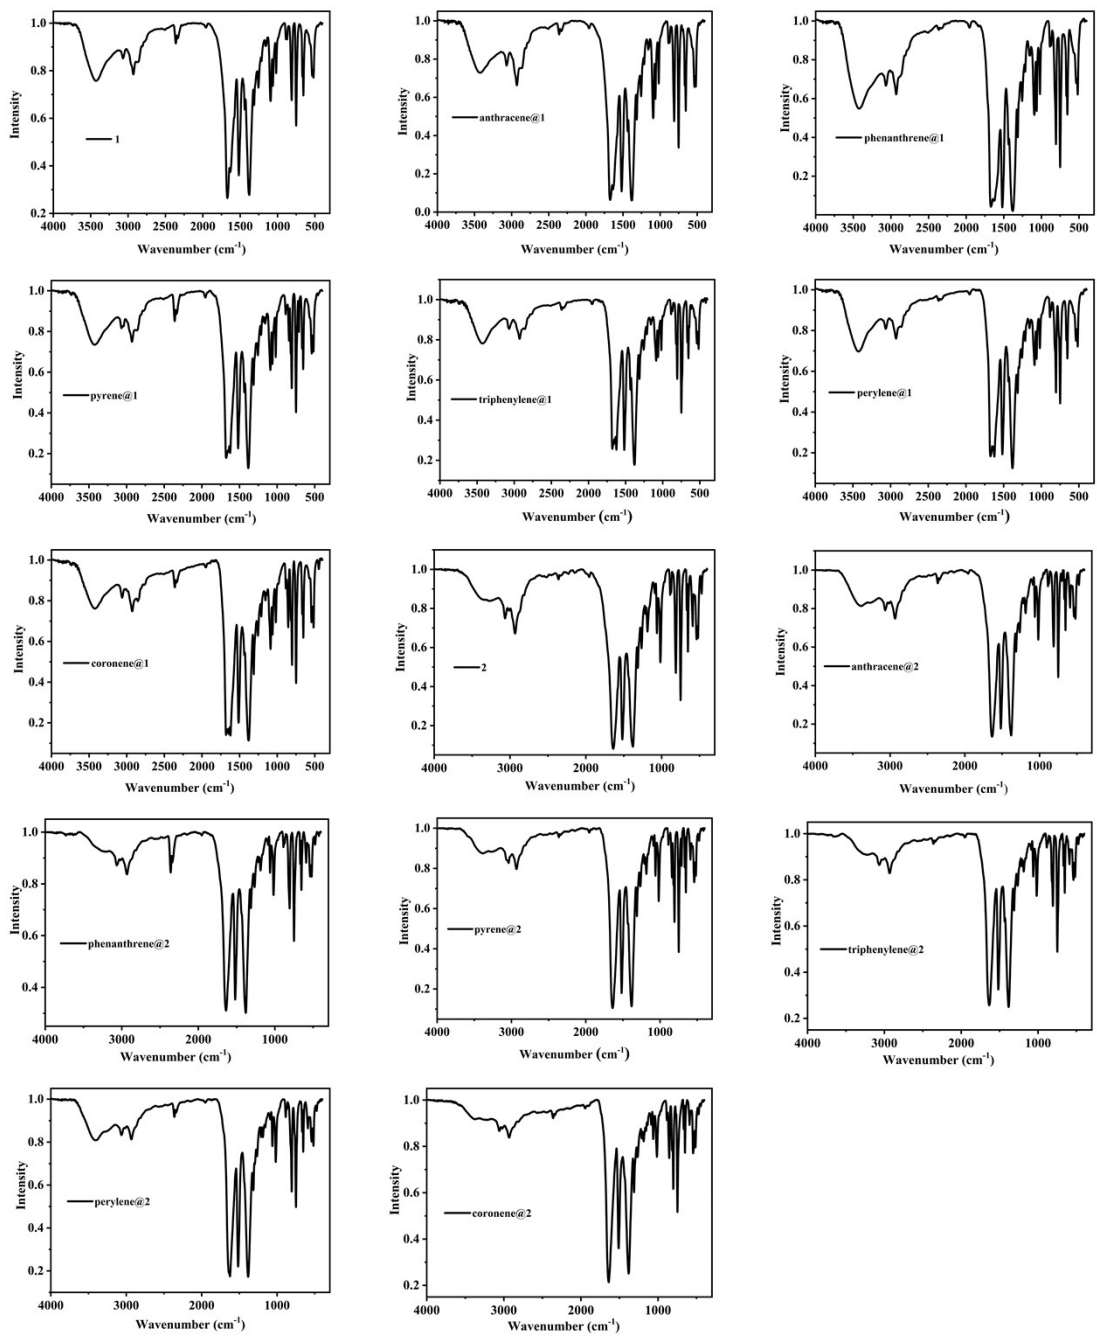

**Fig. S7** Infrared spectroscopy of 1, 2, PAHs@1 and PAHs@2.

**Table S1** Crystal data and structure refinement parameters for the partial LCPs.

| Compound                                                                           | <b>1</b>                                                                        | <b>2</b>                                                                        |
|------------------------------------------------------------------------------------|---------------------------------------------------------------------------------|---------------------------------------------------------------------------------|
| Formula                                                                            | C <sub>42</sub> H <sub>24</sub> Cd <sub>3</sub> FN <sub>6</sub> O <sub>12</sub> | C <sub>42</sub> H <sub>24</sub> Zn <sub>3</sub> FN <sub>6</sub> O <sub>12</sub> |
| Formula weight                                                                     | 1160.92                                                                         | 1019.78                                                                         |
| T (K)                                                                              | 175.57                                                                          | 286.9                                                                           |
| Radiation (Å)                                                                      | Cu Kα (λ = 1.54184)                                                             | Cu Kα (λ = 1.54184)                                                             |
| Crystal system                                                                     | Hexagonal                                                                       | Hexagonal                                                                       |
| space group                                                                        | <i>P</i> 6 <sub>3</sub> / <i>m</i> mc                                           | <i>P</i> 6 <sub>3</sub> / <i>m</i> mc                                           |
| CCDC number                                                                        | 2099209                                                                         | 2283604                                                                         |
| <i>a</i> (Å)                                                                       | 17.4307                                                                         | 16.9122                                                                         |
| <i>b</i> (Å)                                                                       | 17.4307                                                                         | 16.9122                                                                         |
| <i>c</i> (Å)                                                                       | 15.9206                                                                         | 14.6638                                                                         |
| <i>α</i> (deg)                                                                     | 90                                                                              | 90                                                                              |
| <i>β</i> (deg)                                                                     | 90                                                                              | 90                                                                              |
| <i>γ</i> (deg)                                                                     | 120                                                                             | 120                                                                             |
| <i>V</i> (Å <sup>3</sup> )                                                         | 4189.09                                                                         | 3632.26                                                                         |
| <i>Z</i>                                                                           | 2                                                                               | 2                                                                               |
| <i>D</i> (g/cm <sup>-3</sup> )                                                     | 0.920                                                                           | 0.932                                                                           |
| <i>μ</i> /mm <sup>-1</sup>                                                         | 6.373                                                                           | 1.533                                                                           |
| <i>F</i> (000)                                                                     | 1134.0                                                                          | 1026                                                                            |
| GOF on <i>F</i> <sup>2</sup>                                                       | 1.114                                                                           | 1.109                                                                           |
| <i>R</i> <sub><i>I</i></sub> , <i>wR</i> <sub>2</sub> [ <i>I</i> > 2σ( <i>I</i> )] | <i>R</i> <sub>1</sub> = 0.0489, <i>wR</i> <sub>2</sub> = 0.1454                 | <i>R</i> <sub>1</sub> = 0.0533, <i>wR</i> <sub>2</sub> = 0.1320                 |
| <i>R</i> <sub><i>I</i></sub> , <i>wR</i> <sub>2</sub> [all data]                   | <i>R</i> <sub>1</sub> = 0.0497, <i>wR</i> <sub>2</sub> = 0.1461                 | <i>R</i> <sub>1</sub> = 0.0551, <i>wR</i> <sub>2</sub> = 0.1331                 |

<sup>a</sup>*R*<sub>1</sub> = Σ||*F*<sub>o</sub>|-*F*<sub>c</sub>||/Σ|*F*<sub>o</sub>|. <sup>b</sup>*wR*<sub>2</sub> = {Σ[*w*(*F*<sub>o</sub><sup>2</sup>-*F*<sub>c</sub><sup>2</sup>)<sup>2</sup>]/Σ[*w*(*F*<sub>o</sub><sup>2</sup>)<sup>2</sup>]}<sup>1/2</sup>

| Compound                                                                    | <b>perylene@1</b>                                                               | <b>perylene@2</b>                                                               |
|-----------------------------------------------------------------------------|---------------------------------------------------------------------------------|---------------------------------------------------------------------------------|
| Formula                                                                     | C <sub>62</sub> H <sub>36</sub> Cd <sub>3</sub> FN <sub>6</sub> O <sub>12</sub> | C <sub>62</sub> H <sub>36</sub> Zn <sub>3</sub> FN <sub>6</sub> O <sub>12</sub> |
| Formula weight                                                              | 1413.22                                                                         | 1272.08                                                                         |
| T (K)                                                                       | 100.00                                                                          | 100.01                                                                          |
| Radiation (Å)                                                               | Cu Kα (λ = 1.54184)                                                             | Cu Kα (λ = 1.54184)                                                             |
| Crystal system                                                              | Hexagonal                                                                       | Hexagonal                                                                       |
| space group                                                                 | <i>P</i> 6 <sub>3</sub> / <i>mmc</i>                                            | <i>P</i> 6 <sub>3</sub> / <i>mmc</i>                                            |
| CCDC number                                                                 | 2099211                                                                         | 2099081                                                                         |
| <i>a</i> (Å)                                                                | 17.39990                                                                        | 16.91970                                                                        |
| <i>b</i> (Å)                                                                | 17.39990                                                                        | 16.91970                                                                        |
| <i>c</i> (Å)                                                                | 15.63180                                                                        | 14.57180                                                                        |
| <i>α</i> (deg)                                                              | 90                                                                              | 90                                                                              |
| <i>β</i> (deg)                                                              | 90                                                                              | 90                                                                              |
| <i>γ</i> (deg)                                                              | 120                                                                             | 120                                                                             |
| V (Å <sup>3</sup> )                                                         | 4098.58                                                                         | 3612.68                                                                         |
| <i>Z</i>                                                                    | 2                                                                               | 2                                                                               |
| D (g/m <sup>3</sup> )                                                       | 1.145                                                                           | 1.169                                                                           |
| <i>μ</i> /mm <sup>-1</sup>                                                  | 6.601                                                                           | 1.642                                                                           |
| F (000)                                                                     | 1398.0                                                                          | 1290                                                                            |
| GOF on F <sup>2</sup>                                                       | 1.115                                                                           | 1.107                                                                           |
| <i>R</i> <sub>1</sub> , <i>wR</i> <sub>2</sub> [ <i>I</i> > 2σ( <i>I</i> )] | <i>R</i> <sub>1</sub> = 0.0670, <i>wR</i> <sub>2</sub> = 0.2192                 | <i>R</i> <sub>1</sub> = 0.0897, <i>wR</i> <sub>2</sub> = 0.2608                 |
| <i>R</i> <sub>1</sub> , <i>wR</i> <sub>2</sub> [all data]                   | <i>R</i> <sub>1</sub> = 0.0680, <i>wR</i> <sub>2</sub> = 0.2203                 | <i>R</i> <sub>1</sub> = 0.0903, <i>wR</i> <sub>2</sub> = 0.2613                 |

$${}^a R = \frac{\sum ||F_o| - |F_c||}{\sum |F_o|}, \quad {}^b wR_2 = \left\{ \frac{\sum [w(F_o^2 - F_c^2)^2]}{\sum [w(F_o^2)^2]} \right\}^{1/2}.$$



|                                                                             |                                                                                 |
|-----------------------------------------------------------------------------|---------------------------------------------------------------------------------|
| Compound                                                                    | <b>triphenylene@1</b>                                                           |
| Formula                                                                     | C <sub>60</sub> H <sub>36</sub> Cd <sub>3</sub> FN <sub>6</sub> O <sub>12</sub> |
| Formula weight                                                              | 1389.2                                                                          |
| T (K)                                                                       | 107                                                                             |
| Radiation (Å)                                                               | Cu Kα (λ = 1.54184)                                                             |
| Crystal system                                                              | Hexagonal                                                                       |
| space group                                                                 | <i>P6<sub>3</sub>/mmc</i>                                                       |
| CCDC number                                                                 | 2099210                                                                         |
| <i>a</i> (Å)                                                                | 17.38640                                                                        |
| <i>b</i> (Å)                                                                | 17.38640                                                                        |
| <i>c</i> (Å)                                                                | 15.72710                                                                        |
| α (deg)                                                                     | 90                                                                              |
| β (o)                                                                       | 90                                                                              |
| γ (o)                                                                       | 120                                                                             |
| V (Å <sup>3</sup> )                                                         | 4117.17                                                                         |
| Z                                                                           | 2                                                                               |
| D (g/m <sup>3</sup> )                                                       | 1.121                                                                           |
| μ/mm <sup>-1</sup>                                                          | 6.563                                                                           |
| F (000)                                                                     | 1374.0                                                                          |
| GOF on F <sup>2</sup>                                                       | 1.174                                                                           |
| <i>R</i> <sub>1</sub> , <i>wR</i> <sub>2</sub> [ <i>I</i> > 2σ( <i>I</i> )] | <i>R</i> <sub>1</sub> = 0.0576, <i>wR</i> <sub>2</sub> = 0.1807                 |
| <i>R</i> <sub>1</sub> , <i>wR</i> <sub>2</sub> [all data]                   | <i>R</i> <sub>1</sub> = 0.0576, <i>wR</i> <sub>2</sub> = 0.1807                 |

$${}^aR = \sum ||F_o| - |F_c|| / \sum |F_o|, {}^b wR_2 = \{ \sum [w(F_o^2 - F_c^2)^2] / \sum [w(F_o^2)^2] \}^{1/2}.$$

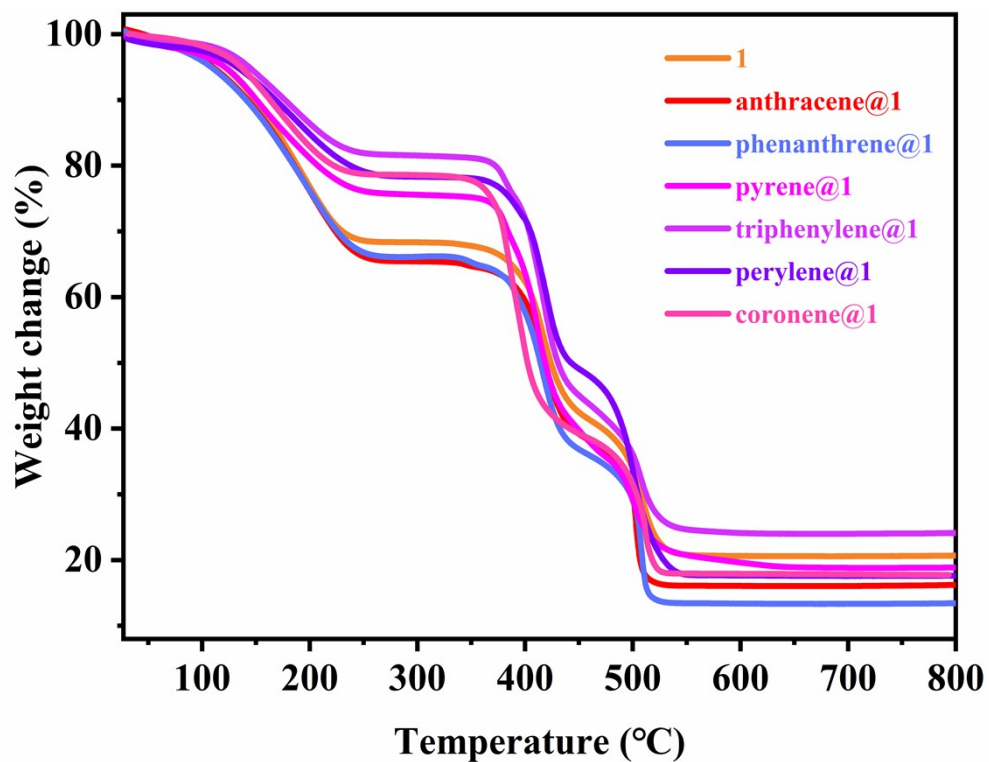

Fig. S8 The thermogravimetric curve of 1 and PAHs@1 at air atmosphere.

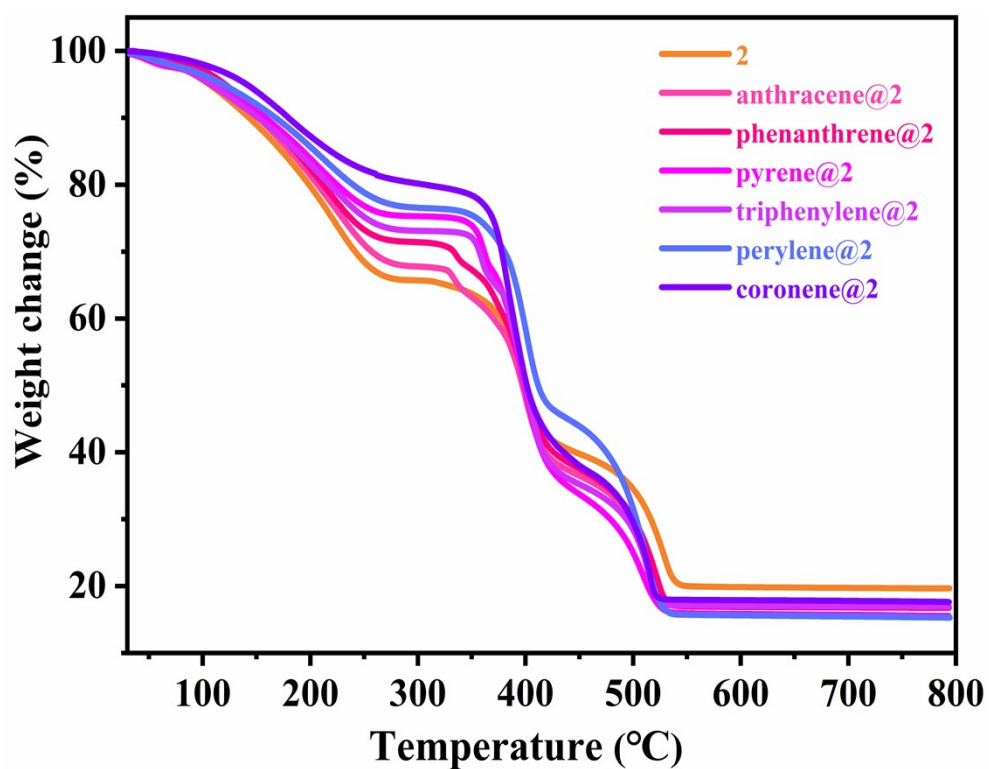

Fig. S9 The thermogravimetric curve of 2 and PAHs@2 at air atmosphere.

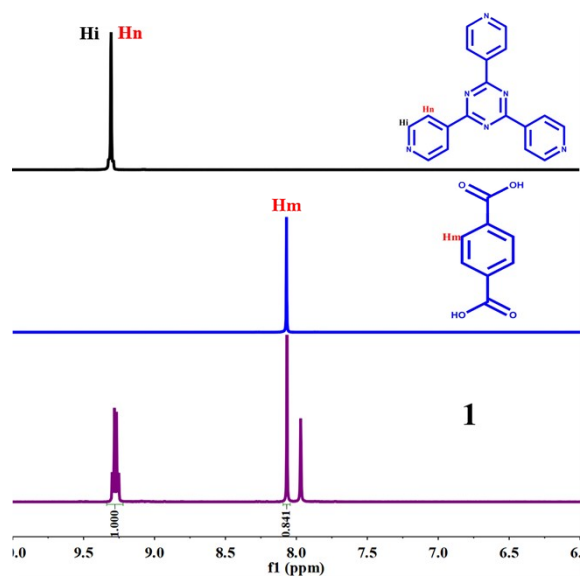

**Fig. S10** The  $^1\text{H}$  NMR spectra of digested **1** crystal samples and the corresponding ligands and guest.

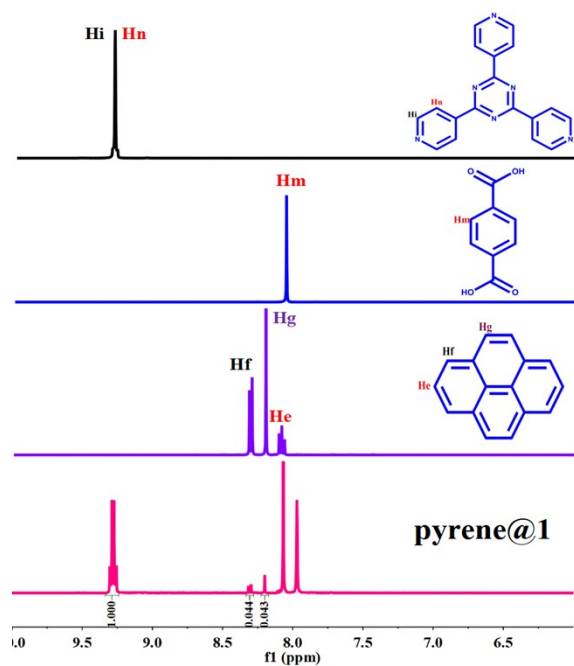

**Fig. S11** The  $^1\text{H}$  NMR spectra of digested **pyrene@1** crystal samples and the corresponding ligands and guest.

| <b>pyrene@1</b> | Feeding amount of pyrene | Experimental $^1\text{H}$ integral area ratio for TPT to guest | Experimental TPT to guest molecular ratio | Loading ratio of pyrene |
|-----------------|--------------------------|----------------------------------------------------------------|-------------------------------------------|-------------------------|
|                 | 0.025 mmol               | 1:0.044                                                        | 7.58:1                                    | 13.2%                   |

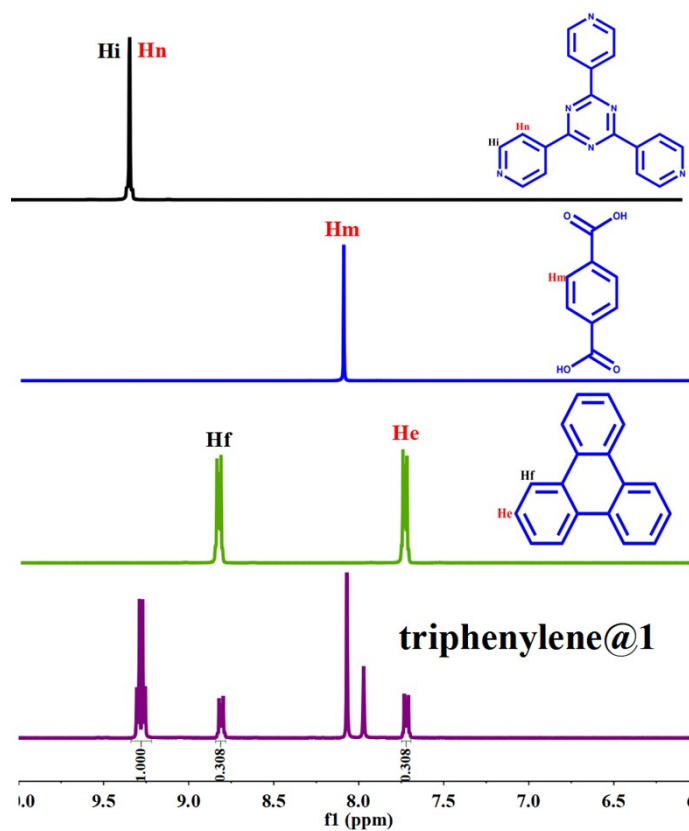

**Fig. S12** The  $^1\text{H}$  NMR spectra of digested **triphenylene@1** crystal samples and the corresponding ligands and guest.

| <b>triphenylene@1</b> | Feeding amount of triphenylene | Experimental $^1\text{H}$ integral area ratio for TPT to guest | Experimental TPT to guest molecular ratio | Loading ratio of triphenylene |
|-----------------------|--------------------------------|----------------------------------------------------------------|-------------------------------------------|-------------------------------|
|                       | 0.025 mmol                     | 1:0.308                                                        | 1.62:1                                    | 61.7%                         |

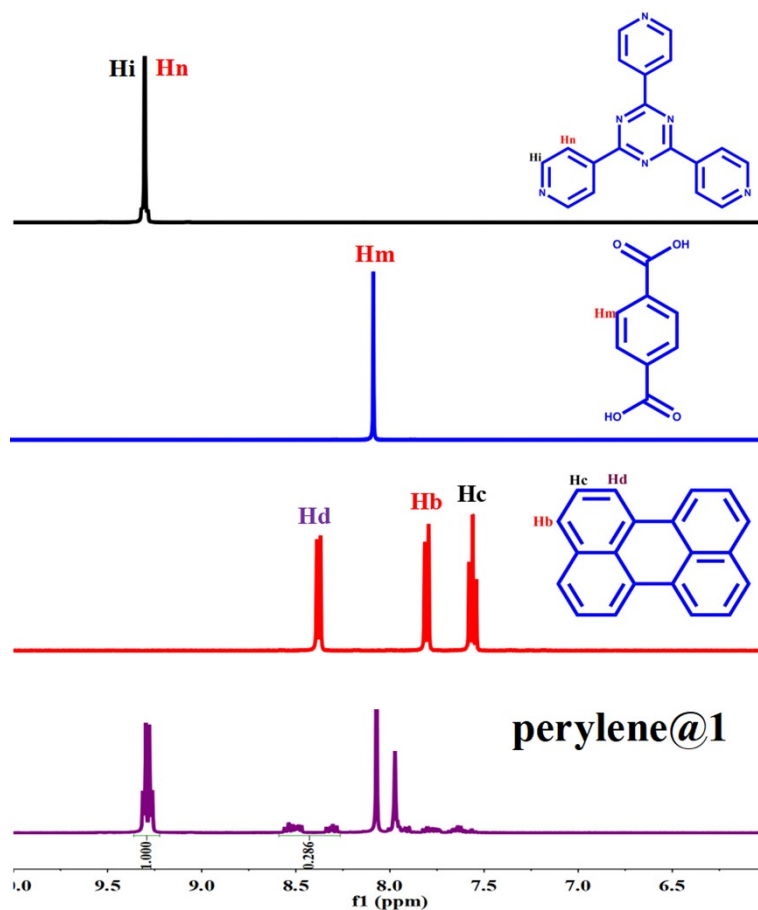

**Fig. S13** The  $^1\text{H}$  NMR spectra of digested **perylene@1** crystal samples and the corresponding ligands and guest.

| <b>perylene@1</b> | Feeding amount of perylene | Experimental $^1\text{H}$ integral area ratio for TPT to guest | Experimental TPT to guest molecular ratio | Loading ratio of perylene |
|-------------------|----------------------------|----------------------------------------------------------------|-------------------------------------------|---------------------------|
|                   | 0.025 mmol                 | 1:0.286                                                        | 1.17:1                                    | 85.4%                     |

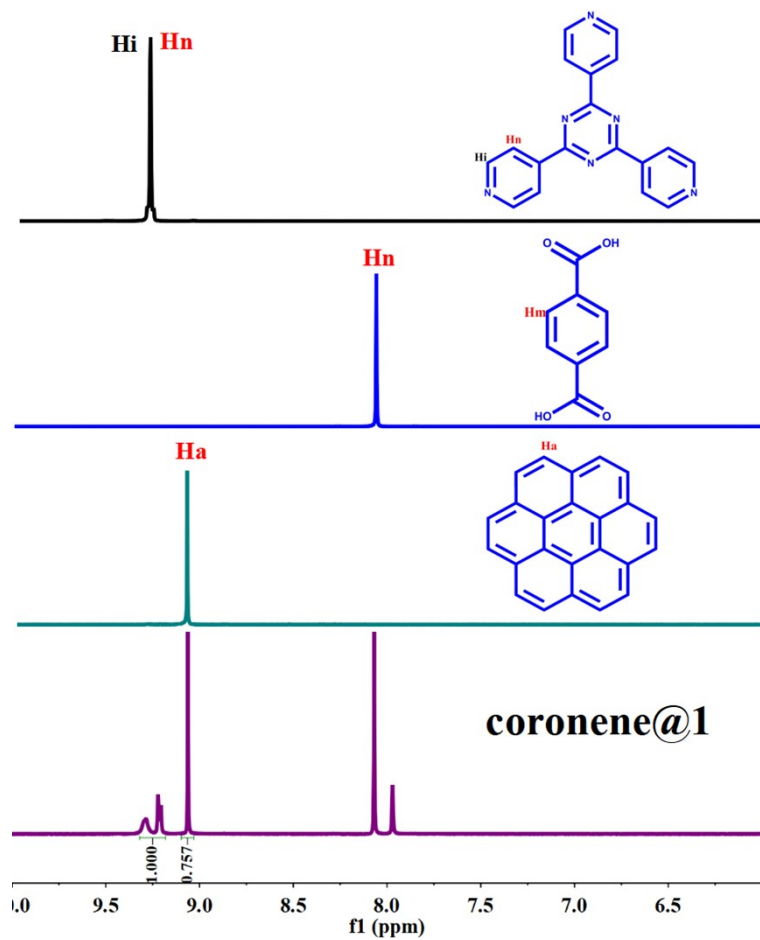

**Figure. S14** The <sup>1</sup>H NMR spectra of digested **coronene@1** crystal samples and the corresponding ligands and guest.

|                   | Feeding amount<br>of coronene | Experimental <sup>1</sup> H<br>integral area ratio for<br>TPT to guest | Experimental TPT to<br>guest molecular ratio | Loading ratio of<br>coronene |
|-------------------|-------------------------------|------------------------------------------------------------------------|----------------------------------------------|------------------------------|
| <b>coronene@1</b> | 0.025 mmol                    | 1:0.757                                                                | 1.32:1                                       | 75.8%                        |

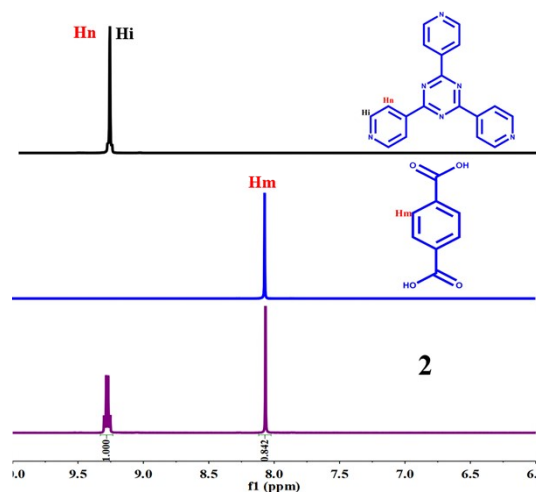

**Fig. S15** The  $^1\text{H}$  NMR spectra of digested **2** crystal samples and the corresponding ligands and guest.

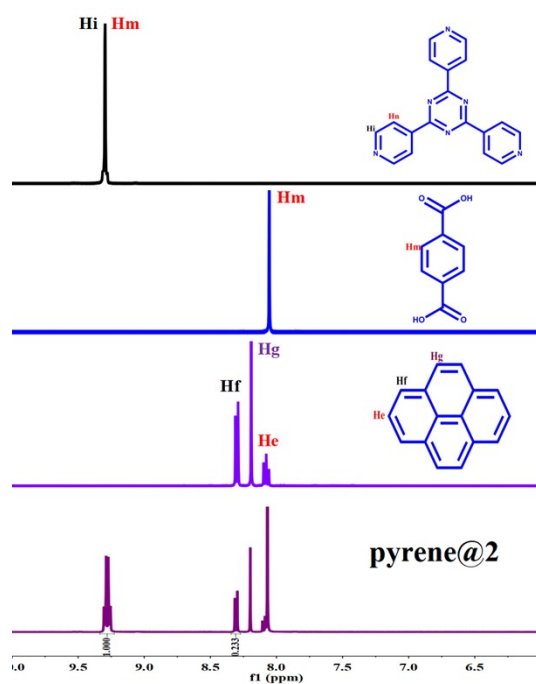

**Fig. S16** The  $^1\text{H}$  NMR spectra of digested **pyrene@2** crystal samples and the corresponding ligands and guest.

| <b>pyrene@2</b> | Feeding amount<br>of pyrene | Experimental $^1\text{H}$<br>integral area ratio for<br>TPT to guest | Experimental TPT to<br>guest molecular ratio | Loading ratio of<br>pyrene |
|-----------------|-----------------------------|----------------------------------------------------------------------|----------------------------------------------|----------------------------|
|                 | 0.025 mmol                  | 1:0.233                                                              | 1.43:1                                       | 69.9%                      |

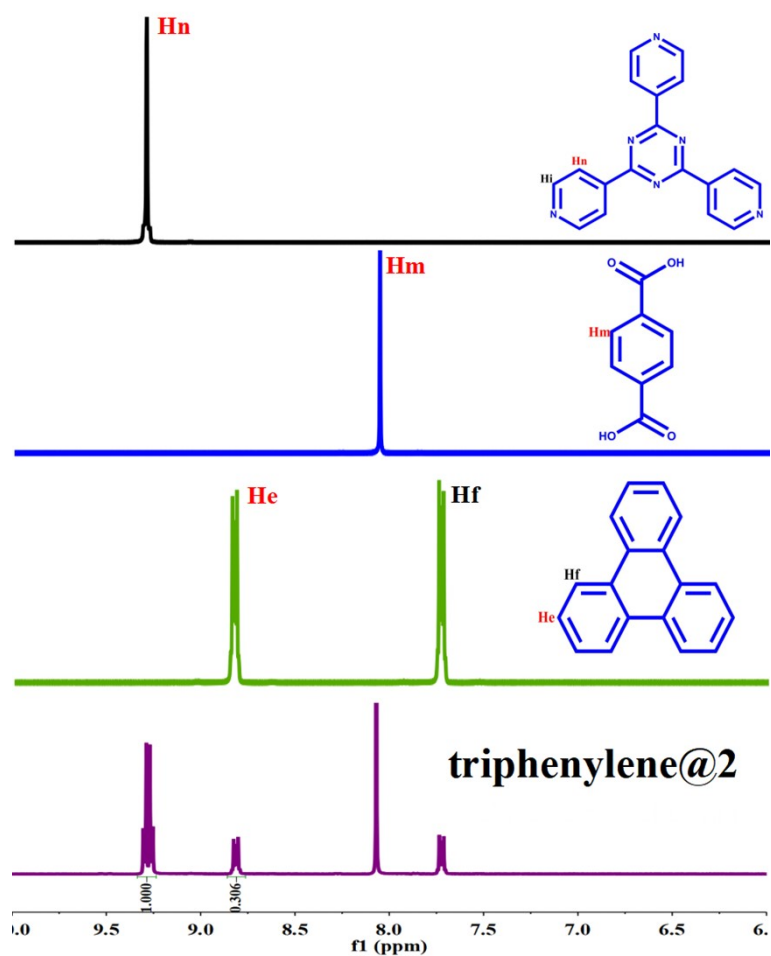

**Fig. S17** The  $^1\text{H}$  NMR spectra of digested **triphenylene@2** crystal samples and the corresponding ligands and guest.

| <b>triphenylene@2</b> | Feeding amount of triphenylene | Experimental $^1\text{H}$ integral area ratio for TPT to guest | Experimental TPT to guest molecular ratio | Loading ratio of triphenylene |
|-----------------------|--------------------------------|----------------------------------------------------------------|-------------------------------------------|-------------------------------|
|                       | 0.025 mmol                     | 1:0.306                                                        | 1.63:1                                    | 61.3%                         |



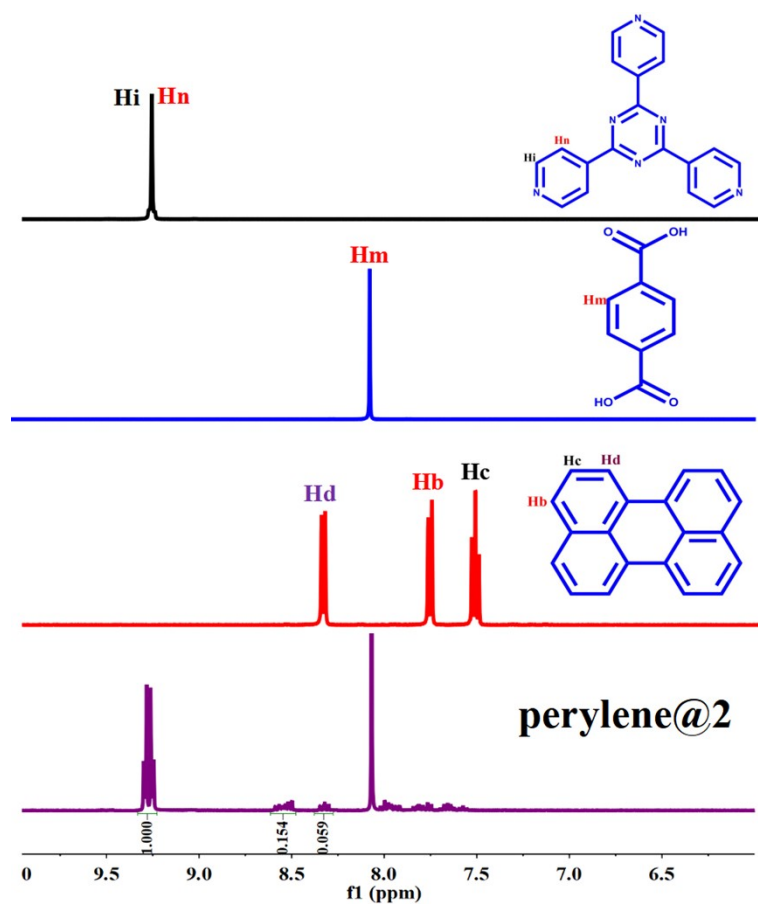

**Fig. S18** The  $^1\text{H}$  NMR spectra of digested **perylene@2** crystal samples and the corresponding ligands and guest.

| <b>perylene@2</b> | Feeding amount of perylene | Experimental $^1\text{H}$ integral area ratio for TPT to guest | Experimental TPT to guest molecular ratio | Loading ratio of perylene |
|-------------------|----------------------------|----------------------------------------------------------------|-------------------------------------------|---------------------------|
|                   | 0.025 mmol                 | 1:0.213                                                        | 1.56:1                                    | 63.9%                     |

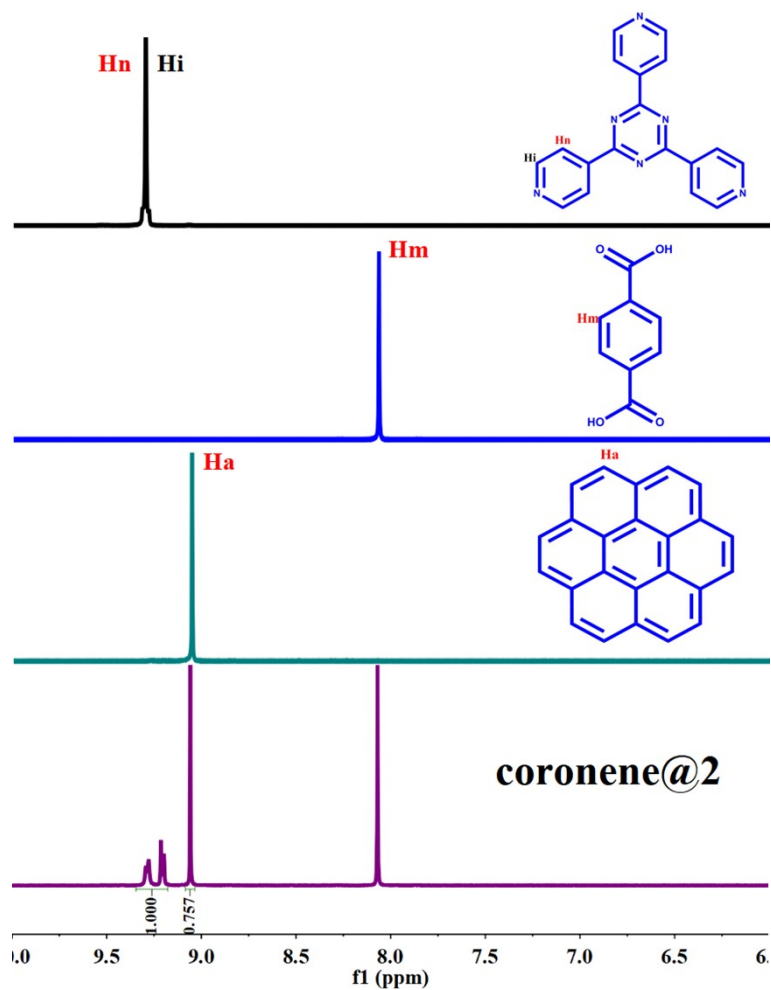

**Fig. S19** The  $^1\text{H}$  NMR spectra of digested **coronene@2** crystal samples and the corresponding ligands and guest.

|                   | Feeding amount<br>of coronene | Experimental $^1\text{H}$<br>integral area ratio for<br>TPT to guest | Experimental TPT to<br>guest molecular ratio | Loading ratio of<br>coronene |
|-------------------|-------------------------------|----------------------------------------------------------------------|----------------------------------------------|------------------------------|
| <b>coronene@2</b> | 0.025 mmol                    | 1:0.757                                                              | 1.32:1                                       | 75.7%                        |

**Table S2.** Guest loading in PAHs@1 and PAHs@2.

| compound | PAHs   |              |          |          |
|----------|--------|--------------|----------|----------|
|          | pyrene | triphenylene | perylene | coronene |
| PAHs@1   | 13.2   | 61.7         | 85.4     | 75.8     |
| PAHs@2   | 69.9   | 61.3         | 63.9     | 75.7     |

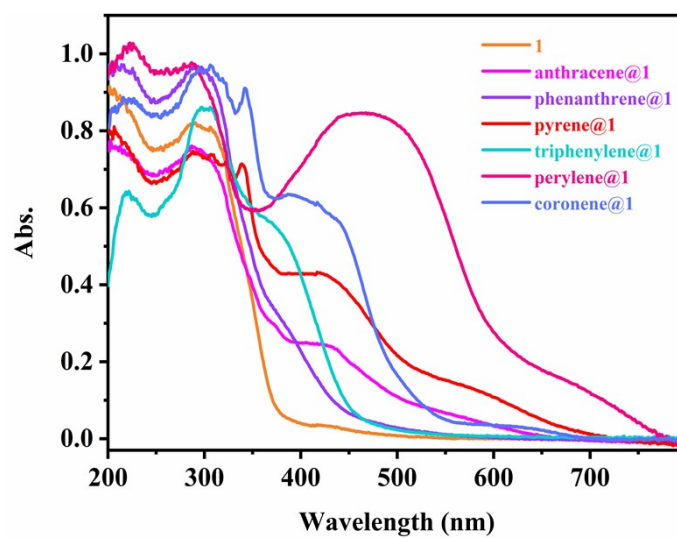

**Fig. S20** UV-vis spectra of the complexes **1** and PAHs@1.

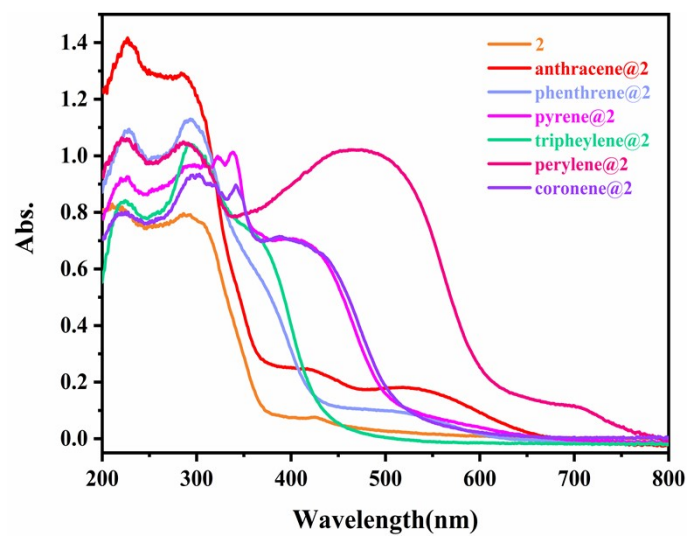

**Fig. S21** UV-vis spectra of the complexes **2** and PAHs@2.

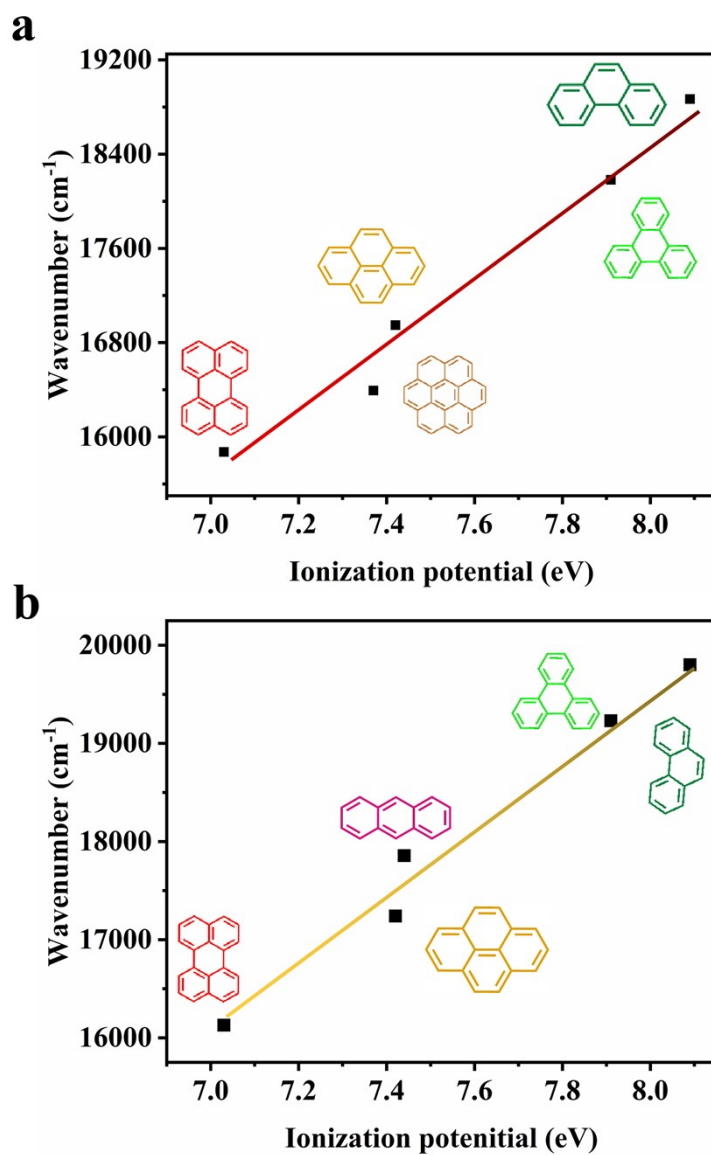

**Fig. S22** Linear correlation between the wavenumber of PAHs@1 (a) and PAHs@2 (b) and the ionization potential (IP) of corresponding guests. (Ionization potential data obtained from ref <sup>1-4</sup>)

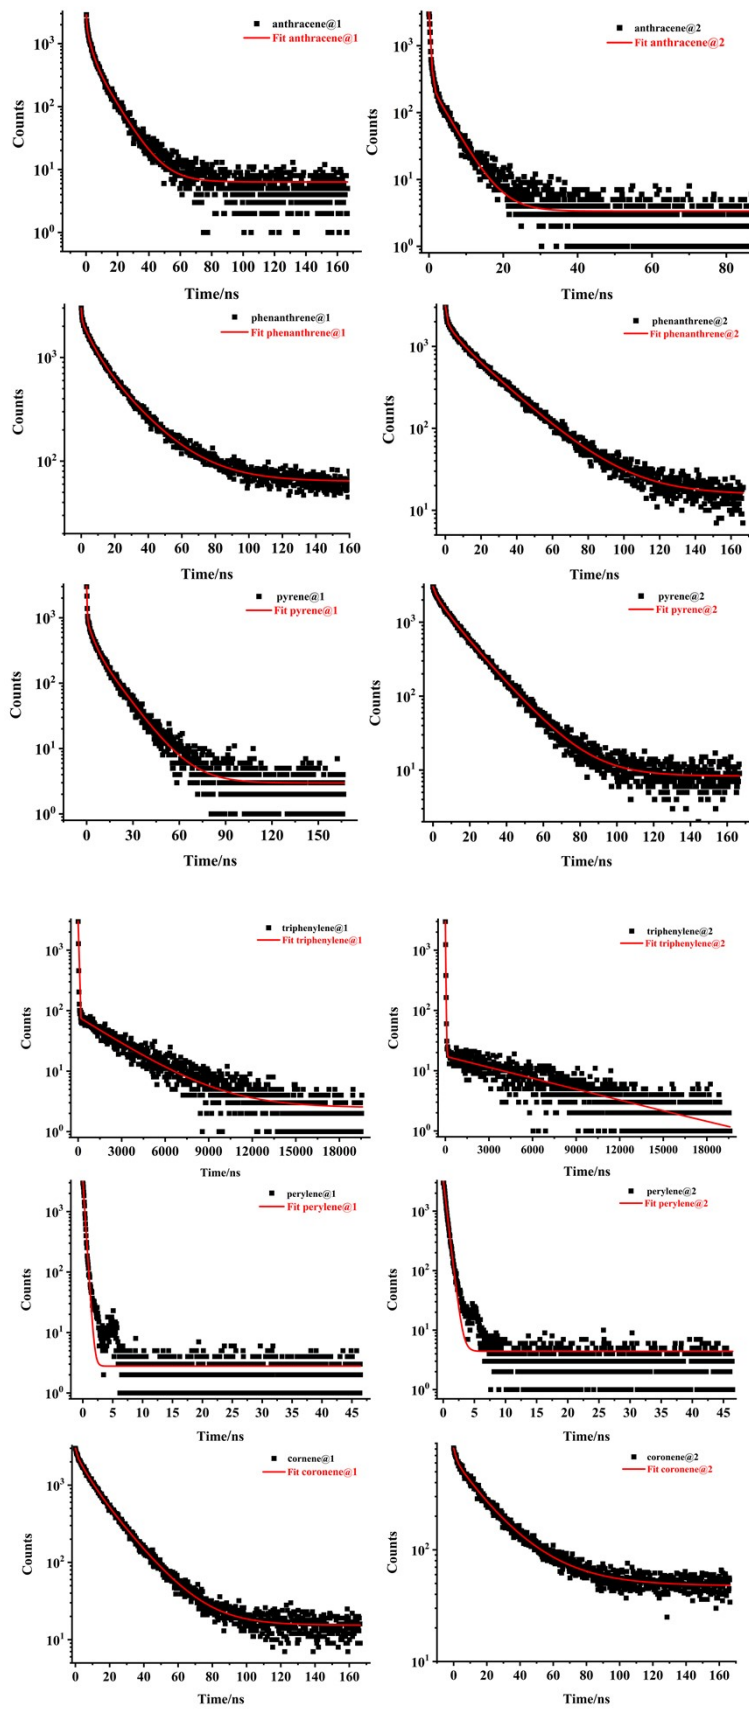

| Complex               | $\tau$ (ns)                                    | average $\tau$ (ns) | $\chi^2$ |
|-----------------------|------------------------------------------------|---------------------|----------|
| <b>anthracene@1</b>   | $\tau_1=1.40$ $\tau_2= 6.06$ $\tau_3=16.04$    | $\tau =9.04$        | 1.3239   |
| <b>phenanthrene@1</b> | $\tau_1=1.41$ $\tau_2= 10.37$ $\tau_3=26.26$   | $\tau=19.85$        | 0.9562   |
| <b>pyrene@1</b>       | $\tau_1=0.21$ $\tau_2= 3.84$ $\tau_3=14.09$    | $\tau=10.39$        | 0.9747   |
| <b>triphenylene@1</b> | $\tau_1=17.90$ $\tau_2= 2980.50$               | $\tau=2326.95$      | 1.0552   |
| <b>perylene@1</b>     | $\tau_1= 0.24$ $\tau_2= 1.75$ $\tau_3=50.00$   | $\tau=2.16$         | 1.1464   |
| <b>coronene@1</b>     | $\tau_1=1.32$ $\tau_2= 8.51$ $\tau_3=17.40$    | $\tau=14.24$        | 0.9858   |
| <b>anthrene@2</b>     | $\tau_1=0.26$ $\tau_2= 2.50$ $\tau_3=8.32$     | $\tau=3.18$         | 1.0455   |
| <b>phenanthrene@2</b> | $\tau_1=0.40$ $\tau_2= 5.13$ $\tau_3=22.20$    | $\tau=20.34$        | 1.0218   |
| <b>pyrene@2</b>       | $\tau_1=1.08$ $\tau_2= 5.96$ $\tau_3=15.55$    | $\tau=14.24$        | 1.0118   |
| <b>triphenylene@2</b> | $\tau_1=16.55$ $\tau_2=71.01$ $\tau_3=5186.66$ | $\tau=3010.52$      | 0.9949   |
| <b>perylene@2</b>     | $\tau_1=0.42$ $\tau_2= 2.00$                   | $\tau=0.7$          | 1.0820   |
| <b>coronene@2</b>     | $\tau_1=2.91$ $\tau_2= 22.14$                  | $\tau=21.37$        | 0.9668   |

**Fig. S23** Emission decay traces and fits results of the fluorescent lifetime ( $\tau$ ) for complexes **PAHs@1** and **PAHs@2** at room temperature.

**Table S3.** Summary of crystallographic parameter data for LCPs.

| <b>code</b>           | <b>a/Å</b> | <b>b/Å</b> | <b>c/Å</b> | <b><math>\alpha</math>/°</b> | <b><math>\beta</math>/°</b> | <b><math>\gamma</math>/°</b> |
|-----------------------|------------|------------|------------|------------------------------|-----------------------------|------------------------------|
| <b>1</b>              | 17.4307    | 17.4307    | 15.9206    | 90                           | 90                          | 120                          |
| <b>anthracene@1</b>   | 17.389     | 17.389     | 15.736     | 90                           | 90                          | 120                          |
| <b>phenanthrene@1</b> | 17.3916    | 17.3916    | 15.7466    | 90                           | 90                          | 120                          |
| <b>pyrene@1</b>       | 17.3925    | 17.3925    | 15.6977    | 90                           | 90                          | 90                           |
| <b>triphenylene@1</b> | 17.3864    | 17.3864    | 15.7271    | 90                           | 90                          | 120                          |
| <b>perylene@1</b>     | 17.399     | 17.399     | 15.631     | 90                           | 90                          | 120                          |
| <b>2</b>              | 16.9122    | 16.9122    | 14.6638    | 90                           | 90                          | 120                          |
| <b>anthracene@2</b>   | 16.9003    | 16.9003    | 14.4398    | 90                           | 90                          | 120                          |
| <b>phenanthrene@2</b> | 16.9225    | 16.9225    | 14.4953    | 90                           | 90                          | 120                          |
| <b>pyrene@2</b>       | 16.90      | 16.90      | 14.394     | 90                           | 90                          | 120                          |
| <b>triphenylene@2</b> | 16.8914    | 16.8914    | 14.5020    | 90                           | 90                          | 120                          |
| <b>perylene@2</b>     | 16.9197    | 16.9197    | 14.5718    | 90                           | 90                          | 120                          |
| <b>coronene@2</b>     | 16.919     | 16.919     | 14.162     | 90                           | 90                          | 120                          |

## References

1. D.-S. Zhang, Q. Gao, Z. Chang, X. T. Liu, B. Zhao, Z. H. Xuan, T. L. Hu, Y. H. Zhang, J. Zhu and X. H. Bu, Rational Construction of Highly Tunable Donor-Acceptor Materials Based on a Crystalline Host-Guest Platform, *Adv Mater*, 2018, **30**, 1804715.
2. J. B. Birks and M. A. Slifkin,  $\pi$ -Electronic Excitation and Ionization Energies of Condensed Ring Aromatic Hydrocarbons, *Nature*, 1961, **191**, 761-764.
3. F. Brogli and E. Heilbronner, The Photoelectron Spectra of Benzenoid Hydrocarbons C<sub>18</sub>H<sub>12</sub>, *Angew. Chem. Int. Ed.*, 1972, **11**, 538-539.
4. E. Clar, J. M. Robertson, R. Schloegl and W. Schmidt, Photoelectron Spectra of Polynuclear Aromatics. 6. Applications to Structural Elucidation: "Circumanthracene", *J. Am. Chem. Soc.*, 1981, **103**, 1320-1328.
